# Supplementary material for: Cell-free Long Noncoding RNAs as Potential Biomarkers in Bone Marrow and Cerebrospinal Fluid Samples of Paediatric B-cell Acute Lymphoblastic Leukaemia
Source: Research Square preprint supplement (doi:10.21203/rs.3.rs-5741715/v1), 2025-01-10
Supplement: Supplementary file 1 [file 33e6d6c187def974ea9f3b28.docx]

**SUPPLEMENTARY MATERIAL**

**Supplementary Table S1. Targets used for the qPCR screening experiment on cell-free bone marrow samples.**

| **Target name** | **ENSEMBL code** | **Expression or role** |
| --- | --- | --- |
| LINC01021/PURPL | ENSG00000250337 | Upregulated in high hyperdiploid B-ALL |
| LINC00544 | ENST00000400540 | Upregulated in high hyperdiploid B-ALL |
| RP1-149C7.1 | ENST00000564251 | Upregulated in high hyperdiploid B-ALL |
| LINC00870 | ENST00000650568 | Upregulated in high hyperdiploid B-ALL |
| RP4-668G5.1/NFIA-AS2 | ENST00000421455 | Upregulated in ETV6-RUNX1/TEL-AML1 t(12; 21) B-ALL |
| RP11-436K8.1/HS_AC099792 | ENST00000423403 | Upregulated in ETV6-RUNX1/TEL-AML1 t(12; 21) B-ALL |
| DBH-AS1/lnc-SARDH-1 | ENST00000425189 | Upregulated in ETV6-RUNX1/TEL-AML1 t(12; 21) B-ALL |
| RP1-35C21.2/AL122019.1 | ENST00000438575 | Upregulated in ETV6-RUNX1/TEL-AML1 t(12; 21) B-ALL |
| RP1-159A19.4/BX293535 | ENST00000443579 | Upregulated in ETV6-RUNX1/TEL-AML1 t(12; 21) B-ALL |
| TCL6 | ENST00000467865 | Upregulated in ETV6-RUNX1/TEL-AML1 t(12; 21) B-ALL |
| CTC-340A15.2/AC109466.1 | ENST00000519570 | Upregulated in ETV6-RUNX1/TEL-AML1 t(12; 21) B-ALL |
| IFNG-AS1/NEST/Tmevpg1 | ENST00000536914 | Upregulated in ETV6-RUNX1/TEL-AML1 t(12; 21) B-ALL |
| CASC15/LINC00340 | ENST00000561912 | Upregulated in ETV6-RUNX1/TEL-AML1 t(12; 21) B-ALL |
| RP11-214L13.1/LINC01416 | ENST00000563553 | Upregulated in ETV6-RUNX1/TEL-AML1 t(12; 21) B-ALL |
| RP11-483C6.1/AL079343 | ENST00000572358 | Upregulated in ETV6-RUNX1/TEL-AML1 t(12; 21) B-ALL |
| RP11-384O8.1/AC010980.2 | ENST00000587099 | Upregulated in ETV6-RUNX1/TEL-AML1 t(12; 21) B-ALL |
| lnc-ASTN1-1 | ENST0000392773 | Upregulated in ETV6-RUNX1/TEL-AML1 t(12; 21) B-ALL |
| LNC-BTBD10-3/LINC00958/(LINC0098?) | ENST00000527945 | Upregulated in ETV6-RUNX1/TEL-AML1 t(12; 21) and High hyperdiploid B-ALL |
| SNHG1 | ENST00000539303 | Upregulated in B-cell development |
| SNHG8 | ENST00000602483 | Upregulated in B-cell development |
| XIST | ENST00000602495 | Upregulated in B-cell development |
| SNHG5 | ENST00000623001 | Upregulated in B-cell development |
| FTX | ENST00000638232 | Upregulated in B-cell development |
| TUG-1 | ENST00000646496 | Upregulated in B-cell development |
| LINC00511 | ENST00000649330 | Upregulated in B-cell development |
| ZEB2-AS1 | ENST00000650024 | Upregulated in B-cell development |
| ZNF695_TV3 | ENST00000366504.6 | Upregulated in B-ALL |
| BLACE | ENST00000378120 | Upregulated in B-ALL |
| LINC01139 | ENST00000400946; ENST00000649127; ENST00000648188; ENST00000649385 | Upregulated in B-ALL |
| SLCO4A1-AS1 | ENST00000411824 | Upregulated in B-ALL |
| LINC00114 | ENST00000411989 | Upregulated in B-ALL |
| RP11-301G19.1/AL713998.1 | ENST00000412872 | Upregulated in B-ALL |
| HCP5/NR_040662 | ENST00000414046 | Upregulated in B-ALL |
| H19 | ENST00000417089 | Upregulated in B-ALL |
| RP11-137H2.4/lnc-DYDC1-1/AC021028.1 | ENST00000417559 | Upregulated in B-ALL |
| BALR2/CDK6-AS1/AC002454.1 | ENST00000419668 | Upregulated in B-ALL |
| AC018462.2 | ENST00000425966 | Upregulated in B-ALL |
| TPTEP1 | ENST00000426585 | Upregulated in B-ALL |
| MEG3 | ENST00000429159 | Upregulated in B-ALL |
| RP11-16L9.4/LINC01221 | ENST00000432488 | Upregulated in B-ALL |
| GAS5 | ENST00000432536 | Upregulated in B-ALL |
| LINC00630 | ENST00000435966 | Upregulated in B-ALL |
| TEX41 | ENST00000445791 | Upregulated in B-ALL |
| AC002454.1/CDK6-AS1/BALR-2 | ENST00000452050 | Upregulated in B-ALL |
| MSH6 | ENST00000454137 | Upregulated in B-ALL |
| RP11-35J23.1/AL136181.1 | ENST00000454484 | Upregulated in B-ALL |
| TTC28.AS1 | ENST00000454741 | Upregulated in B-ALL |
| DCHS2 | ENST00000456341 | Upregulated in B-ALL |
| PAX8-AS1 | ENST00000456685 | Upregulated in B-ALL |
| LINC01013 | ENST00000458028 | Upregulated in B-ALL |
| LRRC3B | ENST00000469437 | Upregulated in B-ALL |
| TAFA5/FAM19A5 | ENST00000473898 | Upregulated in B-ALL |
| FPGS | ENST00000481552 | Upregulated in B-ALL |
| NEAT1 | ENST00000499732 | Upregulated in B-ALL |
| SOCS2-AS1 | ENST00000500986 | Upregulated in B-ALL |
| RP11-24I21.1/LINC02355 | ENST00000503100 | Upregulated in B-ALL |
| LINC00977/CCDC26 | ENST00000509893 | Upregulated in B-ALL |
| MIR146A/MIR3142HG | ENST00000517927 | Upregulated in B-ALL |
| HOXA-AS2 | ENST00000518088 | Upregulated in B-ALL |
| RP11-494M8.4/AC044810 | ENST00000529488 | Upregulated in B-ALL |
| RP11-326C3.2/AC136475.3 | ENST00000534742 | Upregulated in B-ALL |
| OVCH2 | ENST00000534817 | Upregulated in B-ALL |
| RP11-164H13.1/AL139020.2 | ENST00000553445 | Upregulated in B-ALL |
| LINC00984/INAFM2 | ENST00000560415 | Upregulated in B-ALL |
| RP11-68I18.10/AL592424.1 | ENST00000563624 | Upregulated in B-ALL |
| CTA-331P3.1/LOC105377938/AC002464.1 | ENST00000569685 | Upregulated in B-ALL |
| RP11-334C17.5/AC087741 | ENST00000573346 | Upregulated in B-ALL |
| OMG | ENST00000584094 | Upregulated in B-ALL |
| SNHG16 | ENST00000591956 | Upregulated in B-ALL |
| RP5-940J5.9/AC006064.4 | ENST00000602946.1 | Upregulated in B-ALL |
| ZEB1-AS1 | ENST00000606286 | Upregulated in B-ALL |
| KB-208E9/AP000345.2 | ENST00000608615.1 | Upregulated in B-ALL |
| MIR4435-2HG/AWPPH | ENST00000609220 | Upregulated in B-ALL |
| PTCHD3P1/SVIL-AS1 | ENST00000612350.1 | Upregulated in B-ALL |
| FUT8.AS1 | ENST00000621019 | Upregulated in B-ALL |
| LINC01163 | ENST00000630252 | Upregulated in B-ALL |
| ERICH1-AS1/AC100797 | ENST00000633407 | Upregulated in B-ALL |
| CRNDE | ENST00000637011 | Upregulated in B-ALL |
| LINC01132/RP4-781K5.8 | ENST00000642107 | Upregulated in B-ALL |
| LINC00152/CYTOR | ENST00000642451 | Upregulated in B-ALL |
| LAMP5-AS1 | ENST00000443469 | Upregulated in B-ALL |
| LUCAT1 | ENST00000650017 | Upregulated in B-ALL |
| MALAT1 | ENST00000618227 | Upregulated in B-ALL |
| LINC00963 | ENST00000423918; ENST00000412141 | Oncogenic or tumor-suppressor role in malignancies |
| HOTAIR | ENST00000425595 | Oncogenic or tumor-suppressor role in malignancies |
| MIR155HG | ENST00000456917 | Oncogenic or tumor-suppressor role in malignancies |
| PVT1 | ENST00000524165; ENST00000522963 | Oncogenic or tumor-suppressor role in malignancies |
| TERC | ENST00000602385 | Oncogenic or tumor-suppressor role in malignancies |
| DLEU2 | ENST00000651713 | Oncogenic or tumor-suppressor role in malignancies |

**Supplementary Table S2. Average 2-dCT values of each target measured in the screening experiment performed on cell-free bone marrow samples and p values of the paired T-test.**

| **lncRNA** | **AVG d0 2-dCT** | **SD (d0)** | **AVG d33 2-dCT** | **SD (d33)** | **P (paired T-test)** |
| --- | --- | --- | --- | --- | --- |
| NEAT1 | 2.54 | 3.23 | 0.08 | 0.54 | NS |
| LRRC3B | 1.36 | 2.19 | -0.39 | 0.72 | NS |
| AC006064.4 | 9.05 | 4.15 | 0.89 | 0.28 | NS |
| SOCS2-AS1 | 0.31 | 0.73 | -1.12 | 0.90 | NS |
| SCLO4A1-AS1 | 0.20 | 0.33 | -1.16 | 0.70 | NS |
| SNHG16 | 0.15 | 0.30 | -2.12 | 1.49 | NS |
| PTCHD3PI | 0.02 | 0.02 | -1.99 | 0.69 | NS |
| FUT8-AS1 | 0.02 | 0.04 | -2.71 | 1.19 | NS |
| AL136181.1 | 0.09 | 0.15 | -1.64 | 0.80 | NS |
| LINC01013 | 0.12 | 0.17 | -2.22 | 1.51 | 0.0072 |
| DLEU2 | 0.01 | 0.02 | -2.58 | 0.96 | NS |
| SNHG5 | 0.06 | 0.13 | -2.05 | 1.11 | NS |
| PURPL | 0.00 | 0.00 | -3.48 | 0.78 | NS |
| AC002464.1 | 0.03 | 0.05 | -2.41 | 1.19 | 0.0127 |
| PAX8-AS1 | 0.07 | 0.17 | -2.30 | 1.28 | NS |
| AC018462.1 | 0.03 | 0.05 | -2.56 | 1.30 | NS |
| AC002454.1 | 0.01 | 0.02 | -2.86 | 1.08 | 0.0348 |
| BLACE | 0.02 | 0.04 | -2.74 | 1.17 | NS |
| AC021028.1 | 0.04 | 0.07 | -2.37 | 1.26 | NS |
| AL713998.1 | 0.02 | 0.03 | -2.92 | 1.19 | NS |
| TPTEP1 | 0.00 | 0.01 | -3.17 | 1.00 | NS |
| ZNF695 | 0.01 | 0.01 | -3.03 | 1.08 | NS |
| BX293535.1 | 0.01 | 0.01 | -2.94 | 1.02 | 0.0062 |
| SNHG8 | 0.00 | 0.01 | -3.11 | 0.88 | NS |
| AP000345.2 | 0.00 | 0.01 | -3.51 | 0.89 | NS |
| LINC00630 | 0.00 | 0.00 | -3.25 | 0.78 | NS |
| LINC00958 | 0.02 | 0.03 | -2.76 | 1.13 | 0.036 |
| TCL6 | 0.01 | 0.01 | -3.20 | 1.10 | NS |
| AL592424.1 | 0.04 | 0.07 | -2.83 | 1.38 | NS |
| LUCAT1 | 0.03 | 0.04 | -3.19 | 1.42 | 0.0375 |
| XIST | 0.06 | 0.14 | -2.58 | 1.34 | NS |
| FTX | 0.01 | 0.02 | -3.28 | 1.22 | NS |
| AC136475.3 | 0.00 | 0.01 | -3.52 | 0.95 | NS |
| AL133457.1 | 0.01 | 0.03 | -3.29 | 1.20 | NS |
| LINC01139 | 0.00 | 0.00 | -3.43 | 0.84 | NS |
| AC010980.1 | 0.00 | 0.01 | -3.36 | 0.98 | NS |
| TTC28-AS1 | 0.00 | 0.00 | -3.87 | 0.65 | NS |
| CYTOR | 0.01 | 0.02 | -3.44 | 1.09 | NS |
| AC100797.2 | 0.00 | 0.01 | -3.62 | 0.81 | NS |
| OVCH2 | 0.00 | 0.01 | -3.48 | 0.95 | NS |
| IFNG-AS1 | 0.04 | 0.15 | -3.52 | 1.14 | NS |
| AL139020.1 | 0.00 | 0.01 | -3.47 | 0.89 | NS |
| OMG | 0.01 | 0.03 | -3.51 | 1.14 | NS |
| MALAT1 | 0.00 | 0.00 | -3.42 | 0.85 | NS |
| AL136114.1 | 0.01 | 0.02 | -3.44 | 1.18 | NS |
| MSH6 | 0.00 | 0.00 | -3.79 | 0.63 | NS |
| AC087741.1 | 0.00 | 0.00 | -3.99 | 0.56 | NS |
| TERC | 0.01 | 0.02 | -3.52 | 1.15 | NS |
| LINC00870 | 0.00 | 0.01 | -3.69 | 0.92 | NS |
| ZEB1-AS1 | 0.00 | 0.00 | -3.62 | 0.82 | NS |
| CCDC26 | 0.00 | 0.00 | -3.99 | 0.50 | NS |
| LINC02355 | 0.01 | 0.02 | -3.43 | 0.94 | NS |
| GAS5 | 0.00 | 0.01 | -3.56 | 1.02 | NS |
| MIR155HG | 0.00 | 0.01 | -3.74 | 0.77 | NS |
| AC002454.1 | 0.00 | 0.00 | -3.88 | 0.62 | NS |
| H19 | 0.00 | 0.00 | -3.98 | 0.54 | NS |
| LINC01416 | 0.00 | 0.00 | -3.73 | 0.79 | NS |
| MIR4435-2HG | 0.00 | 0.00 | -3.89 | 0.67 | NS |
| DBH-AS1 | 0.00 | 0.00 | -3.76 | 0.81 | NS |
| SNHG1 | 0.00 | 0.00 | -4.02 | 0.54 | NS |
| AC044810.2 | 0.00 | 0.00 | -3.98 | 0.57 | NS |
| LINC00963 | 0.00 | 0.00 | -3.92 | 0.67 | NS |
| CASC15 | 0.00 | 0.01 | -3.68 | 0.83 | NS |
| MIR3142HG | 0.00 | 0.00 | -3.95 | 0.57 | NS |
| DCHS2 | 0.00 | 0.00 | -3.95 | 0.59 | NS |
| HOXA-AS2 | 0.01 | 0.05 | -3.87 | 0.97 | NS |
| LINC01221 | 0.00 | 0.00 | -3.91 | 0.73 | NS |
| AL079343.1 | 0.00 | 0.00 | -3.92 | 0.55 | NS |
| LINC00114 | 0.00 | 0.00 | -3.96 | 0.50 | NS |
| PVT1 | 0.00 | 0.00 | -3.94 | 0.61 | NS |
| AC109466.1 | 0.00 | 0.00 | -4.04 | 0.55 | NS |
| AC099792.1 | 0.00 | 0.01 | -3.85 | 0.85 | NS |
| LINC00511 | 0.00 | 0.01 | -3.91 | 0.82 | NS |
| TEX41 | 0.00 | 0.00 | -3.87 | 0.79 | NS |
| HCP5 | 0.01 | 0.03 | -3.83 | 0.93 | NS |
| CRNDE | 0.00 | 0.01 | -3.86 | 0.84 | NS |
| ASTN1 | 0.00 | 0.00 | -3.90 | 0.71 | NS |

NS: no significant difference.

**Supplementary Figure S3. Heatmap of the targets investigated in the screening experiment performed on cell-free bone marrow samples.** Targets with negligible signals were excluded from this figure.Targets are listed on the y-axis. Patient identifiers and sampling days are listed on the x-axis.

**Supplementary Table S4. Expression and function of the five target lncRNAs in acute lymphoblastic leukaemia and other diseases.**

| **lncRNA (ENSEMBL code) [synonyms] {type}** | **Location** | **Expression in childhood ALL** | **Function, prognostic relevance in childhood ALL** | **Expression and function in other diseases** |
| --- | --- | --- | --- | --- |
| **LINC01013**  (ENSG00000228495; ENST00000458028)  [RP3-523C21.1; lncRNA AERRIE]  {Linc} | Chr 6: 132,455,118-132,468,198 FS | 1) Downregulated in patients with early relapse and early death [1]  2) Upregulated in childhood ALL compared to nonmalignant hematologic diseases [2] | low expression is associated with higher risks of relapse and death in B-lineage ALL [1] | 1) Over-expressed in ALCL in comparison with adjacent noncancerous and in vitro studies demonstrated that its up-regulation enhanced tumor cell invasion through the induction of snail-fibronectin activation cascade [3]  2) High expression in hepatocellular carcinoma cell lines. Associated with poor prognosis. Its knockdown suppressed growth and stem-like traits of HCC cells in vivo [4]  3) Bladder cancer, higher expression was linked to poor prognosis [5]  4) Nonmalignant conditions: pathogeneses: calcific aortic valve disease, myocardial fibrosis, physiological processes, such as DNA damage signaling and repair, and a potential novel treatment strategy for cartilage tissue regeneration, using the chondrogenic differentiation of mesenchymal stem cells [6-9] |
| **AC002464.1**  (ENSG00000260188; ENST00000452050)  [CTA-331P3.1; LOC105377938]  {AS} | Chr 6: 110,799,110-110,800,639 FS | Upregulated compared to healthy controls; discriminates B-ALL from T-ALL [10]  overexpressed in the Reh and NALM-6 pre-B ALL cell lines [11] | Knockdown significantly increased apoptosis when treated with either camptothecin, doxorubicin, or prednisolone [11] | Upregulated in AML [10]  Included in a prognostic panel for AML [12] |
| **AC002454.1**  (ENSG00000237819; ENST00000419668)  [CDK6-AS1; BALR-2]  {AS} | Chr 7: 92,484,223-92,546,488 FS | - | High expression correlated with poor overall survival and diminished response to prednisone treatment. Knockdown led to reduced proliferation, increased apoptosis, and increased sensitivity to prednisolone treatment [11] | - |
| **BX293535.1**  (ENSG00000237429; ENST00000443579)  [RP1-159A19.4]  {AS} | Chr 1: 27,852,316-27,857,072 FS | Higher expression in ETV6/RUNX1 [13] | - | Included in prognostic panels for pancreatic adenocarcinoma [14] and gastric cancer [15, 16] |
| **LINC00958**  (ENSG00000251381; ENST00000527945)  [LNC-BTBD10-3]  {Linc} | Chr 11: 12,984,057-13,011,094 RS | Higher expression in ETV6/RUNX1 and high hyperdiploid subtypes [17-19] | - | The overexpression of LINC00958 is significantly related to poor OS, positive LNM, advanced degree of infiltration, and advanced TNM stage in various cancers [20]. |

ALCL - Anaplastic Large Cell Lymphoma; AML - Acute Myeloid Leukemia; AS - Antisense; Chr - Chromosome; FS - Forward Strand; Linc - Long Intergenic; RS - Reverse Strand.

References:

1. Bárcenas-López DA, Núñez-Enríquez JC, Hidalgo-Miranda A, Beltrán-Anaya FO, May-Hau DI, Jiménez-Hernández E, et al. Transcriptome Analysis Identifies LINC00152 as a Biomarker of Early Relapse and Mortality in Acute Lymphoblastic Leukemia. Genes (Basel). 2020;11(3).

2. Xia J, Wang M, Zhu Y, Bu C, Li T. Differential mRNA and long noncoding RNA expression profiles in pediatric B-cell acute lymphoblastic leukemia patients. BMC Pediatr. 2022;22(1):10.

3. Chung IH, Lu PH, Lin YH, Tsai MM, Lin YW, Yeh CT, et al. The long non-coding RNA LINC01013 enhances invasion of human anaplastic large-cell lymphoma. Sci Rep. 2017;7(1):295.

4. Wang W, Xu S, Di Y, Zhang Z, Li Q, Guo K, et al. Novel role of LINC01013/miR-6795-5p/FMNL3 axis in the regulation of hepatocellular carcinoma stem cell features. Acta Biochim Biophys Sin (Shanghai). 2021;53(6):652-62.

5. Wu Y, Zhang L, He S, Guan B, He A, Yang K, et al. Identification of immune-related LncRNA for predicting prognosis and immunotherapeutic response in bladder cancer. Aging (Albany NY). 2020;12(22):23306-25.

6. Chignon A, Argaud D, Boulanger MC, Mkannez G, Bon-Baret V, Li Z, et al. Genome-wide chromatin contacts of super-enhancer-associated lncRNA identify LINC01013 as a regulator of fibrosis in the aortic valve. PLoS Genet. 2022;18(1):e1010010.

7. Quaife NM, Chothani S, Schulz JF, Lindberg EL, Vanezis K, Adami E, et al. LINC01013 Is a Determinant of Fibroblast Activation and Encodes a Novel Fibroblast-Activating Micropeptide. J Cardiovasc Transl Res. 2023;16(1):77-85.

8. Pham TP, Bink DI, Stanicek L, van Bergen A, van Leeuwen E, Tran Y, et al. Long Non-coding RNA Aerrie Controls DNA Damage Repair via YBX1 to Maintain Endothelial Cell Function. Front Cell Dev Biol. 2020;8:619079.

9. Yang H, Cao Y, Zhang J, Liang Y, Su X, Zhang C, et al. DLX5 and HOXC8 enhance the chondrogenic differentiation potential of stem cells from apical papilla via LINC01013. Stem Cell Res Ther. 2020;11(1):271.

10. Buono L, Iside C, De Matteo A, Stellato P, Beneduce G, de Vera d'Aragona RP, et al. Specific lncRNA signatures discriminate childhood acute leukaemias: a pilot study. Cancer Cell Int. 2022;22(1):373.

11. Ouimet M, Drouin S, Lajoie M, Caron M, St-Onge P, Gioia R, et al. A childhood acute lymphoblastic leukemia-specific lncRNA implicated in prednisolone resistance, cell proliferation, and migration. Oncotarget. 2017;8(5):7477-88.

12. Wang S, Yang L, Liu Y, Xu Y, Zhang D, Jiang Z, et al. A Novel Immune-Related Competing Endogenous RNA Network Predicts Prognosis of Acute Myeloid Leukemia. Front Oncol. 2020;10:1579.

13. Cuadros M, García DJ, Andrades A, Arenas AM, Coira IF, Baliñas-Gavira C, et al. LncRNA-mRNA Co-Expression Analysis Identifies AL133346.1/CCN2 as Biomarkers in Pediatric B-Cell Acute Lymphoblastic Leukemia. Cancers (Basel). 2020;12(12).

14. Wang Z, Yuan Q, Chen X, Luo F, Shi X, Guo F, et al. A prospective prognostic signature for pancreatic adenocarcinoma based on ubiquitination-related mRNA-lncRNA with experimental validation in vitro and vivo. Funct Integr Genomics. 2023;23(3):263.

15. Liang X, Yu G, Zha L, Guo X, Cheng A, Qin C, et al. Identification and Comprehensive Prognostic Analysis of a Novel Chemokine-Related lncRNA Signature and Immune Landscape in Gastric Cancer. Front Cell Dev Biol. 2021;9:797341.

16. Chen Q, Hu L, Chen K. Construction of a Nomogram Based on a Hypoxia-Related lncRNA Signature to Improve the Prediction of Gastric Cancer Prognosis. Front Genet. 2020;11:570325.

17. Fernando TR, Rodriguez-Malave NI, Waters EV, Yan W, Casero D, Basso G, et al. LncRNA Expression Discriminates Karyotype and Predicts Survival in B-Lymphoblastic Leukemia. Mol Cancer Res. 2015;13(5):839-51.

18. Ghazavi F, De Moerloose B, Van Loocke W, Wallaert A, Helsmoortel HH, Ferster A, et al. Unique long non-coding RNA expression signature in ETV6/RUNX1-driven B-cell precursor acute lymphoblastic leukemia. Oncotarget. 2016;7(45):73769-80.

19. Lajoie M, Drouin S, Caron M, St-Onge P, Ouimet M, Gioia R, et al. Specific expression of novel long non-coding RNAs in high-hyperdiploid childhood acute lymphoblastic leukemia. PLoS One. 2017;12(3):e0174124.

20. Zhang H, Zhang G, Zhang F, Yang X, Li E, Wang B, et al. LINC00958 may be a new prognostic biomarker in various cancers: A meta-analysis and bioinformatics analysis. Front Genet. 2022;13:998442.
